# Supplementary material for: NF-κB Decoy Oligodeoxynucleotide-Loaded Poly Lactic-co-glycolic Acid Nanospheres Facilitate Socket Healing in Orthodontic Tooth Movement
Source: MDPI journal article supplement (doi:10.3390/ijms25105223), 2024-05-10
Supplement: s1 [file s1]

*Key resource table*

| <b>Key resources table</b>                                       |                                                  |                                             |                         |                                        |
|------------------------------------------------------------------|--------------------------------------------------|---------------------------------------------|-------------------------|----------------------------------------|
| <b>Reagent type<br/>(species) or<br/>resource</b>                | <b>Designation</b>                               | <b>Source or<br/>reference</b>              | <b>Identifiers</b>      | <b>Additional<br/>informatio<br/>n</b> |
| Strain, strain<br>background<br>(Rattus<br>norvegicus)<br>(male) | Wistar/ST                                        | SLC, Japan                                  | RRID:RGD_23149<br>28    |                                        |
| Chemical<br>compound,<br>drug                                    | Medetomidine                                     | Nippon Zenyaku<br>Kogyo Co., Ltd.,<br>Japan |                         |                                        |
| Chemical<br>compound,<br>drug                                    | Midazolam                                        | Teva Takeda<br>Yakuhin Ltd.,<br>Japan       |                         |                                        |
| Chemical<br>compound,<br>drug                                    | Butorphanol                                      | Meiji Seika<br>Pharma Co., Ltd.,<br>Japan   |                         |                                        |
| Other                                                            | Nickel-titanium<br>closed coil<br>tension spring | Tomy International,<br>Tokyo, Japan         | Catalog No. 509-29      |                                        |
| Other                                                            | Light-cured<br>composite resin                   | GC, Tokyo, Japan                            | Catalog<br>No.213345K75 |                                        |

|                         |                                                               |                                                |                                       |                           |
|-------------------------|---------------------------------------------------------------|------------------------------------------------|---------------------------------------|---------------------------|
| Commercial assay or kit | Paraformaldehyde                                              | FUJIFILM Wako Pure Chemical Corporation, Japan | Product Code: 163-20145               |                           |
| Commercial assay or kit | Disodium ethylenediamine tetraacetate (EDTA)                  | Nacalai Tesque, Inc., Japan                    | Product Code: 1511145                 |                           |
| Commercial assay or kit | TRAP/ALP stain kit                                            | Fujifilm Wako Pure Chemical, Osaka, Japan      | Product No: 294-67001                 |                           |
| Antibody                | Rabbit Anti-TNF-alpha Polyclonal Antibody, Unconjugated       | Bioss, Woburn, MA, USA                         | Bioss Cat# bs-2081R, RRID:AB_10856075 | IHC dilution ratio: 1:400 |
| Antibody                | Rabbit Anti-IL-1 Beta/IL-1B Polyclonal Antibody, Unconjugated | Bioss, Woburn, MA, USA                         | Bioss Cat# bs-0812R, RRID:AB_10855142 | IHC dilution ratio: 1:400 |
| Antibody                | Rabbit Anti-TGF Beta 1 Polyclonal Antibody, Unconjugated      | Bioss, Woburn, MA, USA                         | Bioss Cat# bs-0086R, RRID:AB_10856457 | IHC dilution ratio: 1:400 |

|          |                                                                        |                                                 |                                                                |                                                                |
|----------|------------------------------------------------------------------------|-------------------------------------------------|----------------------------------------------------------------|----------------------------------------------------------------|
| Antibody | Rabbit Anti-osteopontin<br>Polyclonal<br>Antibody,<br>Unconjugated     | Abcam, Cambridge,<br>UK                         | Abcam Cat#<br>ab8448,<br>RRID:AB_306566                        | IHC<br>dilution<br>ratio: 1:400<br>IF dilution<br>ratio: 1:200 |
| Antibody | Rabbit Anti-cathepsin K<br>Polyclonal<br>Antibody,<br>Unconjugated     | Abcam, Cambridge,<br>UK                         | Abcam Cat#<br>ab19027,<br>RRID:AB_2261274                      | IHC<br>dilution<br>ratio: 1:400<br>IF dilution<br>ratio: 1:150 |
| Antibody | Mouse Anti-NF- $\kappa$ B p65<br>Monoclonal (F-6)<br>Antibody          | Santa Cruz<br>Biotechnology,<br>Dallas, TX, USA | Santa Cruz<br>Biotechnology Cat#<br>sc-8008,<br>RRID:AB_628017 | IF dilution<br>ratio: 1:150                                    |
| Antibody | Rabbit Anti-RANKL<br>Polyclonal<br>Antibody,<br>Unconjugated           | Proteintech Group<br>Inc., Rosemont, IL,<br>USA | Proteintech Cat#<br>23408-1-AP,<br>RRID:AB_2879273             | IF dilution<br>ratio: 1:150                                    |
| Antibody | Rabbit Anti-Osteoprotegerin<br>Polyclonal<br>Antibody,<br>Unconjugated | Abcam, Cambridge,<br>UK                         | Abcam Cat#<br>ab73400,<br>RRID:AB_1640751                      | IF dilution<br>ratio: 1:150                                    |

|                         |                                                           |                                                |                                                  |                                    |
|-------------------------|-----------------------------------------------------------|------------------------------------------------|--------------------------------------------------|------------------------------------|
| Antibody                | Rabbit Anti-Osteocalcin Polyclonal Antibody, Unconjugated | Abcam, Cambridge, UK                           | Abcam Cat# ab93876, RRID:AB_10675660             | IF dilution ratio: 1:200           |
| Antibody                | Donkey Anti-Rabbit IgG H&L (Alexa Fluor® 594)             | Abcam, Cambridge, UK                           | Abcam Cat# ab150076, RRID:AB_2782993             | Secondary Ab dilution ratio: 1:200 |
| Antibody                | Donkey Anti-Rabbit IgG H&L (Alexa Fluor® 488)             | Abcam, Cambridge, UK                           | Abcam Cat# ab150073, RRID:AB_2636877             | Secondary Ab dilution ratio: 1:200 |
| Commercial assay or kit | Bovine Serum Albumin                                      | Vector Laboratories, Inc., Burlingame, CA, USA | Vector Laboratories Cat# B-2007, RRID:AB_2336258 | Dilution conc. 5%                  |
| Commercial assay or kit | Hydrogen peroxide                                         | Abcam, Cambridge, UK                           | Product Code: ab64218                            |                                    |
| Commercial assay or kit | VECTASTAIN Elite ABC Rabbit IgG Kit                       | Vector Laboratories, Inc., Burlingame, CA, USA | Product Code: PK-6101                            |                                    |
| Commercial assay or kit | 3,3'-Diaminobenzidin                                      | Abcam, Cambridge, UK                           | Product Code: ab64238                            |                                    |

|                            |                                                                           |                                                                                    |                                        |  |
|----------------------------|---------------------------------------------------------------------------|------------------------------------------------------------------------------------|----------------------------------------|--|
|                            | e (DAB)<br>substrate kit                                                  |                                                                                    |                                        |  |
| Commercial<br>assay or kit | Hematoxylin                                                               | FUJIFILM Wako<br>Pure Chemical<br>Corporation, Japan                               | Product Code: 131-<br>09665            |  |
| Commercial<br>assay or kit | Vector®<br>TrueVIEW®<br>Autofluorescence<br>Quenching Kit                 | Vector<br>Laboratories, Inc.,<br>Burlingame, CA,<br>USA                            | Vector<br>Laboratories, # SP-<br>8400  |  |
| Commercial<br>assay or kit | VECTASHIELD<br>® Vibrance™<br>Antifade<br>Mounting<br>Medium with<br>DAPI | Vector<br>Laboratories, Inc.,<br>Burlingame, CA,<br>USA                            | Vector<br>Laboratories, # H-<br>1800-2 |  |
| Commercial<br>assay or kit | TRIzol® reagent                                                           | Life Technologies<br>Invitrogen; Thermo<br>Fisher Scientific,<br>Carlsbad, CA, USA | Product Code:<br>15596026              |  |
| Commercial<br>assay or kit | PrimeScript™<br>RT Master Mix                                             | Takara Bio, Otsu,<br>Shiga, Japan                                                  | Product Code:<br>RR036A                |  |
| Commercial<br>assay or kit | Probe qPCR Mix                                                            | Takara Bio, Otsu,<br>Shiga, Japan                                                  | Product Code:<br>RR391A                |  |
| Sequence-<br>based reagent | rat <i>Gapdh</i><br>(glyceraldehyde-                                      | TaqMan Gene<br>Expression Assay                                                    | Assay ID:<br>Rn01775763_g1             |  |

|                        |                                                                                    |                                                                                                           |                         |  |
|------------------------|------------------------------------------------------------------------------------|-----------------------------------------------------------------------------------------------------------|-------------------------|--|
|                        | 3-phosphate dehydrogenase) mRNA                                                    | primers (Applied Biosystems; Thermo Fisher Scientific, Foster City, CA, USA)                              |                         |  |
| Sequence-based reagent | rat <i>Il1b</i> (interleukin 1 beta) mRNA                                          | TaqMan Gene Expression Assay primers (Applied Biosystems; Thermo Fisher Scientific, Foster City, CA, USA) | Assay ID: Rn00580432_m1 |  |
| Sequence-based reagent | rat <i>tnf</i> (tumor necrosis factor) mRNA                                        | TaqMan Gene Expression Assay primers (Applied Biosystems; Thermo Fisher Scientific, Foster City, CA, USA) | Assay ID: Rn01525859_g1 |  |
| Sequence-based reagent | rat <i>Tnfsf11</i> (receptor activation of nuclear factor-κB ligand; Tnfsf11) mRNA | TaqMan Gene Expression Assay primers (Applied Biosystems; Thermo Fisher                                   | Assay ID: Rn00589289_m1 |  |

|                            |                                                                     |                                                                                                                             |                            |  |
|----------------------------|---------------------------------------------------------------------|-----------------------------------------------------------------------------------------------------------------------------|----------------------------|--|
|                            |                                                                     | Scientific, Foster<br>City, CA, USA)                                                                                        |                            |  |
| Sequence-<br>based reagent | rat <i>Tnfrsf11b</i><br>(osteoprotegerin;<br>Tnfrsf11b)<br>mRNA     | TaqMan Gene<br>Expression Assay<br>primers (Applied<br>Biosystems;<br>Thermo Fisher<br>Scientific, Foster<br>City, CA, USA) | Assay ID:<br>Rn00563499_m1 |  |
| Sequence-<br>based reagent | rat <i>Tgfb1</i><br>(transforming<br>growth factor-<br>beta 1) mRNA | TaqMan Gene<br>Expression Assay<br>primers (Applied<br>Biosystems;<br>Thermo Fisher<br>Scientific, Foster<br>City, CA, USA) | Assay ID:<br>Rn00572010_m1 |  |
| Sequence-<br>based reagent | rat <i>Spp1</i> (secreted<br>phosphoprotein<br>1) mRNA              | TaqMan Gene<br>Expression Assay<br>primers (Applied<br>Biosystems;<br>Thermo Fisher<br>Scientific, Foster<br>City, CA, USA) | Assay ID:<br>Rn00681031_m1 |  |

|                        |                                                                       |                                                                                                                             |                            |  |
|------------------------|-----------------------------------------------------------------------|-----------------------------------------------------------------------------------------------------------------------------|----------------------------|--|
| Sequence-based reagent | rat <i>Ctsk</i><br>(cathepsin K )<br>mRNA                             | Takara Bio, Otsu,<br>Shiga, Japan                                                                                           | Assay ID:<br>NM_031560.2   |  |
| Sequence-based reagent | rat <i>Fgf2</i><br>(cathepsin K )<br>mRNA                             | Takara Bio, Otsu,<br>Shiga, Japan                                                                                           | Assay ID:<br>NM_019305.2   |  |
| Sequence-based reagent | rat <i>Bglap</i> (bone<br>gamma-<br>carboxyglutamate<br>protein) mRNA | TaqMan Gene<br>Expression Assay<br>primers (Applied<br>Biosystems;<br>Thermo Fisher<br>Scientific, Foster<br>City, CA, USA) | Assay ID:<br>Rn00566386_g1 |  |
| Software,<br>algorithm | TRI/3D-BON-<br>FCS 3D<br>trabecular bone<br>analysis software         | RATOC System<br>Engineering Co.,<br>Tokyo, Japan                                                                            |                            |  |
| Software,<br>algorithm | ImageJ scientific<br>software                                         | ImageJ version<br>1.52; National<br>Institutes of Health,<br>Bethesda, MD,<br>USA                                           | RRID:SCR_003070            |  |
| Software,<br>algorithm | NIS-Elements D<br>Imaging                                             | Nikon, Tokyo,<br>Japan                                                                                                      | RRID:SCR_014329            |  |



|                        |                                                        |                                                 |                 |  |
|------------------------|--------------------------------------------------------|-------------------------------------------------|-----------------|--|
|                        | Software Version                                       |                                                 |                 |  |
|                        | 2.30                                                   |                                                 |                 |  |
| Software,<br>algorithm | IBM SPSS<br>Statistics for<br>Windows,<br>version 27.0 | IBM Corp.,<br>Armonk, NY., USA                  | RRID:SCR_019096 |  |
| Software,<br>algorithm | GraphPad Prism<br>9 (version 9.3.1)                    | GraphPad Software<br>Inc, San Diego,<br>CA, USA | RRID:SCR_002798 |  |
